# Supplementary material for: Development of a Mobile Device for Odor Identification and Optimization of Its Measurement Protocol Based on the Free-Hand Measurement
Source: MDPI journal article supplement (doi:10.3390/s20216190), 2020-10-30
Supplement: s1 [file s1]

## Supplementary Materials

### Transfer Function Ratios (TFRs)

TFRs calculated from the measurement data obtained through Protocol-5 are shown in the following figures. Mean values and standard deviations of  $\log|K_{m,n}|$  and  $\arg K_{m,n}$  are plotted as squares and shaded areas, respectively. TFRs for water are also shown in Figure 2 in the main text.

#### Water

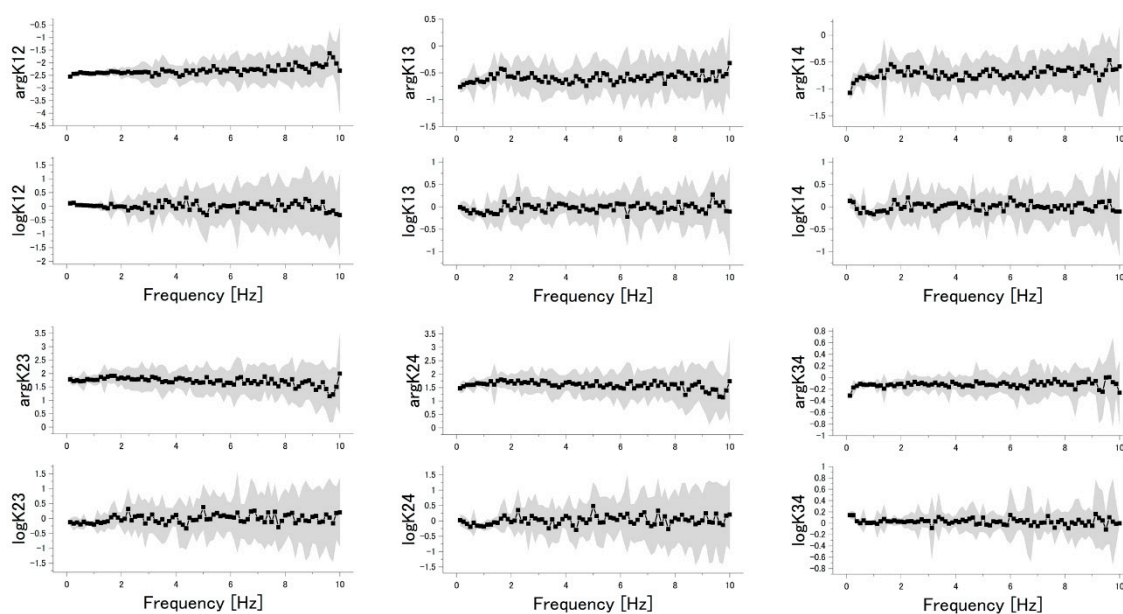

#### Hexane

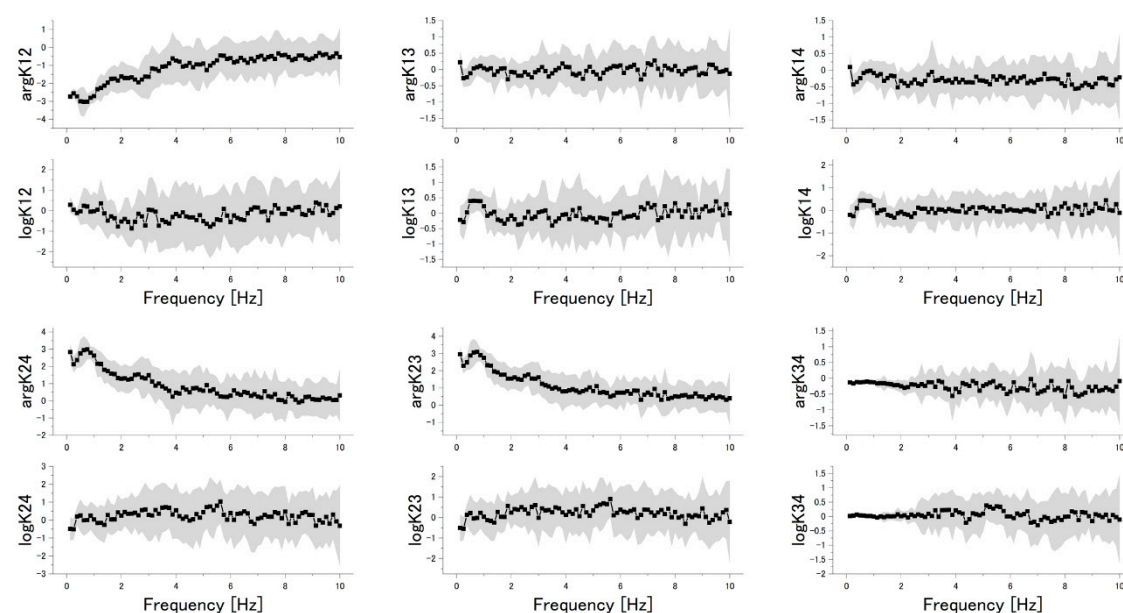

## Methanol

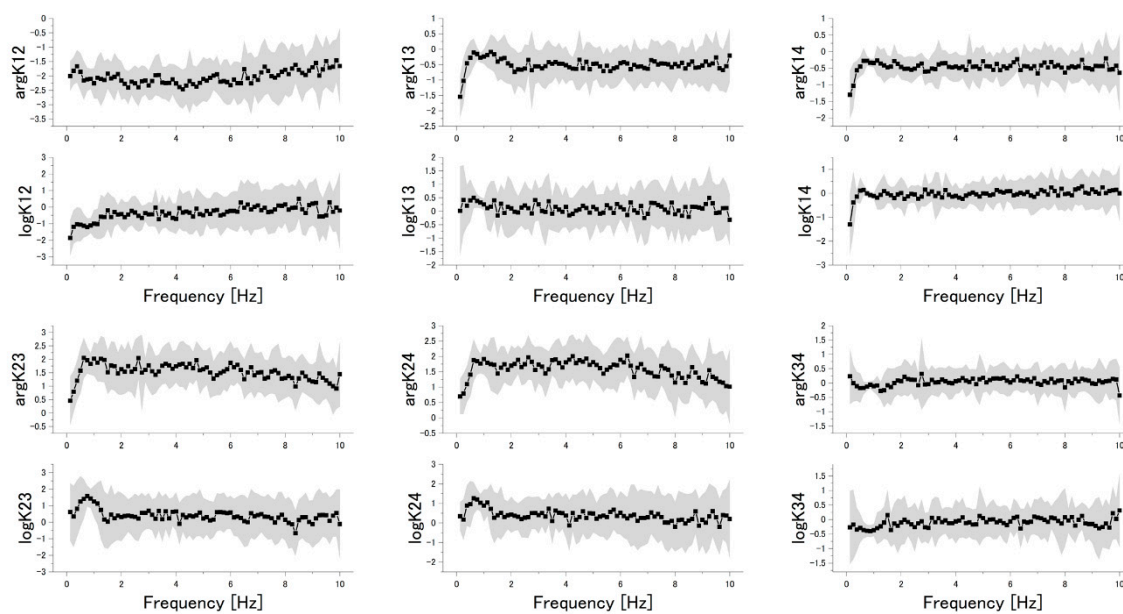

## Acetone

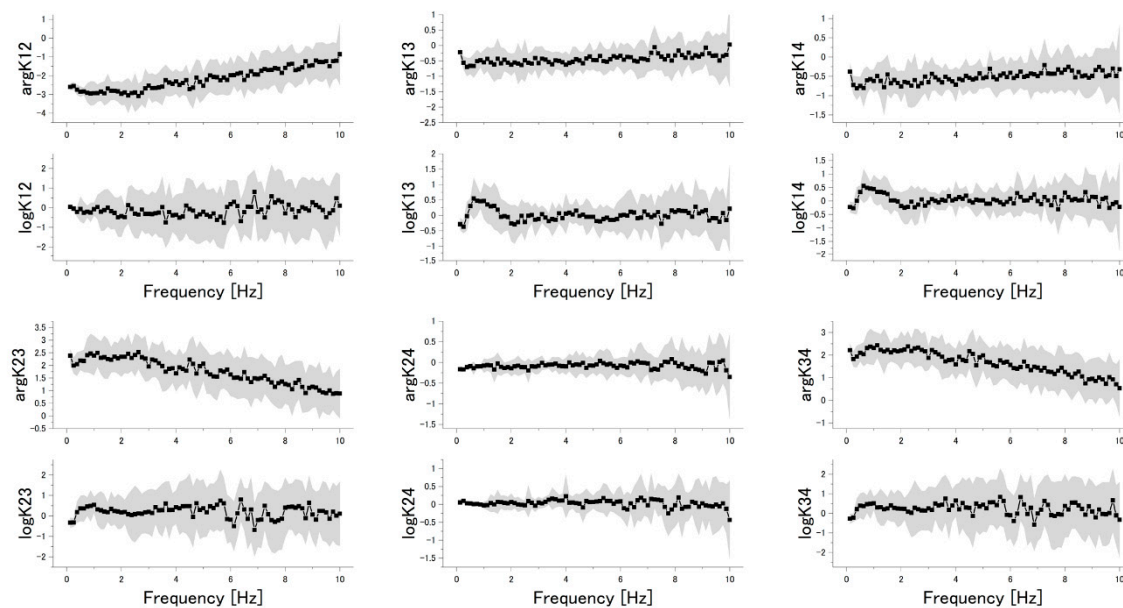

Figure S1. TFRs of the data obtained through Protocol-5.
